# Supplementary material for: A self-powered electrochromic device driven by a nanogenerator
Source: Royal Society of Chemistry journal article supplement (doi:10.1039/c2ee23194h), 2012-01-01
Supplement: c2ee23194h.pdf [file c2ee23194h.pdf]

## SUPPLEMENTARY MATERIAL

**Calculating of average visible optical modulation amplitude.** The average visible optical modulation amplitude ( $\Delta T_{vis}$ ) can be calculated from the followed equation, where  $T_b$  and  $T_c$  are the transmittance of EC-cell in the state of bleached and colored,  $\lambda$  and  $\Delta\lambda$  are the scanning wavelength and scanning step.

$$\Delta T_{vis} = \frac{\sum_{\lambda=380}^{780} [T_b(\lambda) - T_c(\lambda)]}{(780 - 380) / \Delta\lambda} = \frac{\Delta\lambda}{400} \sum_{\lambda=380}^{780} [T_b(\lambda) - T_c(\lambda)]$$

**The testing results of EC in the second type of system.** The following figure shows the electrical properties of the EC-cell and the transmittance spectra at 650 nm in the process of bleaching.

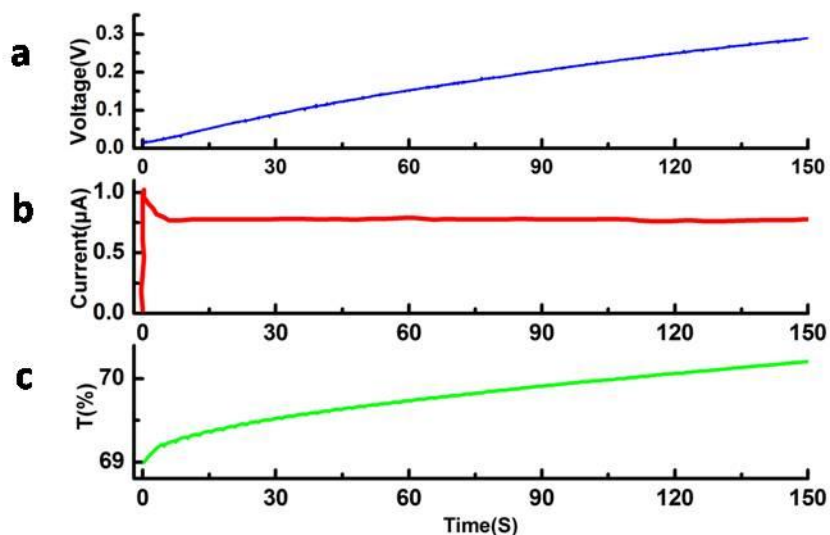

**Fig.S1.** The testing results of EC device with real-time power supply. (a)The  $V_t$  of the process of bleaching; (b) The  $I_t$  of the process of bleaching; (c) The transmittance of the process of bleaching.

**The testing data of EC device by using a hardwire power source.** A square wave signal (1.5v,2Hz) generated by a hardwire power source was applied to replace the NG for the purpose of further comparison. The measurement results are presented in the following figure. The upper figure and middle one are  $V_t$  and  $I_t$  curves of the EC-cell in the process of coloring and bleaching. The transmittance spectra of the EC device at 650 nm is recorded simultaneously and is shown in lower part. It indicates that the electrochromic response time of the EC device for coloring is about 8 second.

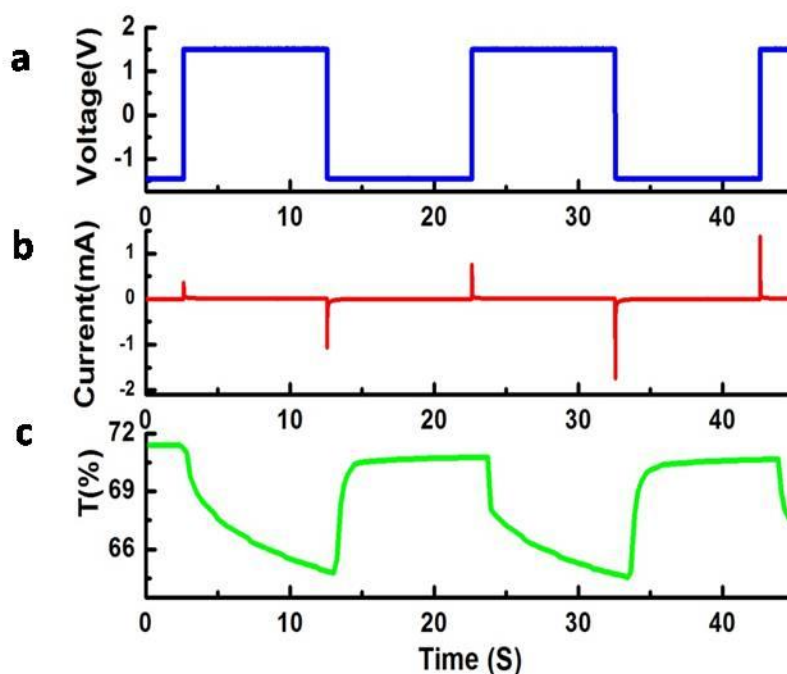

**Fig.S2.** The testing results of EC device powered by a square wave signal. (a)The  $V_t$  of the reversible electrochromic process; (b) The  $I_t$  of the reversible electrochromic process; (c) The transmittance of the reversible electrochromic process.

**The parameter comparison of EC device driven by different power source.** We compared the main parameters of EC device driven by the three types of power supply in this paper, which

are shown in the following table.

**Table S1** The parameters of EC device driven by different power source

| <b>Power Source</b> | <b>ERT (S)</b> | <b><math>\Delta T_{\text{vis}}</math> (%)</b> | <b>CE(cm<sup>2</sup>/C)(<math>\lambda=650\text{nm}</math>)</b> |
|---------------------|----------------|-----------------------------------------------|----------------------------------------------------------------|
| NG charged power    | 10             | 15.3                                          | 58.7                                                           |
| Real-time NG power  | 50             | 5.9                                           | 20.3                                                           |
| Hardwire power      | 8              | 17.2                                          | 53.2                                                           |
